# Supplementary material for: Biological Knowledge of Thornback Ray (Raja clavata) from the Azores: Improving Scientific Information for the Effectiveness of Species-Specific Management Measures
Source: MDPI journal article supplement (doi:10.3390/biology10070676), 2021-07-17
Supplement: s1 [file s1]

# Biological Knowledge of Thornback Ray (*Raja clavata*) from the Azores: Improving Scientific Information for the Effectiveness of Species-Specific Management Measures

Régis Santos <sup>1,2,\*</sup>, Wendell Medeiros-Leal <sup>1,2</sup>, Ana Novoa-Pabon <sup>2,3</sup>, Osman Crespo <sup>2</sup> and Mário Pinho <sup>1,2,3</sup>

<sup>1</sup> IMAR Institute of Marine Research, University of the Azores, 9901-862 Horta, Portugal; wendell.mm.silva@uac.pt (W.M.-L.); mario.rr.pinho@uac.pt (M.P.)

<sup>2</sup> Okeanos R&D Centre, University of the Azores, 9901-862 Horta, Portugal; osman.cresponeto@imbrsea.eu (O.C.); ana.mn.pabon@uac.pt (A.N.-P.)

<sup>3</sup> Department Oceanography and Fisheries, Faculty of Science and Technology, University of the Azores, 9901-862 Horta, Portugal

\* Correspondence: regis.vs.santos@uac.pt; Tel.: +351-292200469

## Supplementary material

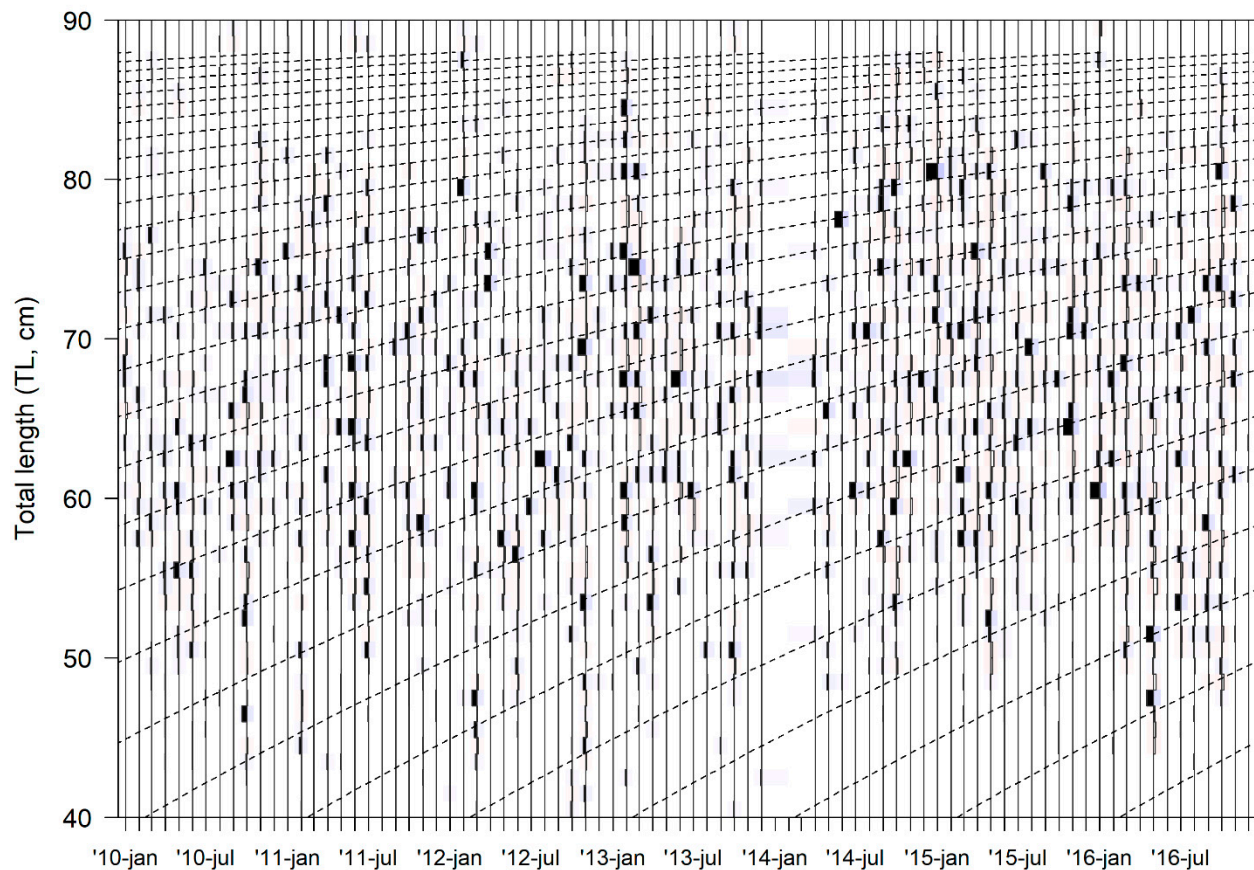

**Figure S1.** Growth curves (dashed lines) for *Raja clavata* in the Azores plotted through the  $L_T$ -frequency data obtained using bootstrapped ELEFAN\_GA model. Black bars indicate positive values (peaks), whereas white bars indicate negative peaks. Shading refers to the difference between moving averages. Data from the EU Data Collection Framework (DCF) for the period 2010–2016.

**Table S1.** Summary of the number of tagged and recaptured thornback rays *Raja clavata* in the Azores. Distance traveled was measured by tracing a straight line between capture and recapture geographical positions.  $L_{T1}$ : total length ( $L_T$ , cm) at capture.  $L_{T2}$ :  $L_T$  at recapture  $\Delta L_T$ : the difference between  $L_{T1}$  and  $L_{T2}$ .  $\Delta T$ : time at liberty expressed in days.  $\Delta L_T \text{ year}^{-1}$ : the annual  $L_T$  increment. Bold highlights the 20 selected recaptures used in the growth analysis ( $\Delta L_T$  larger than zero and  $\Delta T$  larger than 60 days).

| No.    | Sex | Fish condition at release | Distance travelled (km) | $L_{T1}$ (cm) | $L_{T2}$ (cm) | $\Delta L_T$ (cm) | $\Delta T$ (days) | $\Delta L_T \text{ year}^{-1}$ |
|--------|-----|---------------------------|-------------------------|---------------|---------------|-------------------|-------------------|--------------------------------|
| 1      | –   | Active                    | –                       | 61.0          | –             | –                 | 291               | –                              |
| 2      | F   | Active                    | <b>37.4</b>             | <b>63.0</b>   | <b>71.0</b>   | <b>8.0</b>        | <b>325</b>        | <b>8.985</b>                   |
| 3      | F   | Active                    | –                       | 76.0          | –             | –                 | 426               | –                              |
| 4      | F   | Active                    | 35.3                    | 81.0          | 81.0          | 0.0               | 15                | 0.000                          |
| 5      | –   | Active                    | <b>37.2</b>             | <b>37.0</b>   | <b>85.5</b>   | <b>48.5</b>       | <b>1864</b>       | <b>9.497</b>                   |
| 6      | M   | Active                    | –                       | <b>49.0</b>   | <b>54.0</b>   | <b>5.0</b>        | <b>491</b>        | <b>3.717</b>                   |
| 7      | F   | Active                    | –                       | <b>49.0</b>   | <b>72.0</b>   | <b>23.0</b>       | <b>1548</b>       | <b>5.423</b>                   |
| 8      | F   | Active                    | <b>40.5</b>             | <b>50.0</b>   | <b>73.0</b>   | <b>23.0</b>       | <b>1202</b>       | <b>6.984</b>                   |
| 9      | F   | Active                    | –                       | <b>51.0</b>   | <b>59.0</b>   | <b>8.0</b>        | <b>481</b>        | <b>6.071</b>                   |
| 10     | F   | Active                    | –                       | <b>53.0</b>   | <b>58.0</b>   | <b>5.0</b>        | <b>1285</b>       | <b>1.420</b>                   |
| 11     | M   | Active                    | –                       | <b>55.0</b>   | <b>59.0</b>   | <b>4.0</b>        | <b>110</b>        | <b>13.273</b>                  |
| 12     | M   | Active                    | –                       | 56.0          | –             | –                 | 397               | –                              |
| 13     | F   | Active                    | –                       | 56.0          | –             | –                 | 397               | –                              |
| 14     | M   | Active                    | –                       | <b>56.0</b>   | <b>60.0</b>   | <b>4.0</b>        | <b>324</b>        | <b>4.506</b>                   |
| 15     | M   | Active                    | –                       | <b>57.0</b>   | <b>60.0</b>   | <b>3.0</b>        | <b>278</b>        | <b>3.939</b>                   |
| 16     | –   | Active                    | –                       | 57.5          | 50.0          | –                 | 868               | –                              |
| 17     | F   | Active                    | –                       | 59.0          | –             | –                 | 316               | –                              |
| 18     | F   | Active                    | –                       | 63.0          | –             | –                 | 472               | –                              |
| 19     | F   | Active                    | –                       | <b>63.0</b>   | <b>66.0</b>   | <b>3.0</b>        | <b>325</b>        | <b>3.369</b>                   |
| 20     | F   | Active                    | 9.1                     | 69.0          | 69.5          | 0.5               | 11                | 16.591                         |
| 21     | F   | Active                    | <b>37.3</b>             | <b>71.0</b>   | <b>71.5</b>   | <b>0.5</b>        | <b>123</b>        | <b>1.484</b>                   |
| 22     | F   | Active                    | <b>35.1</b>             | <b>76.0</b>   | <b>84.4</b>   | <b>8.4</b>        | <b>524</b>        | <b>5.851</b>                   |
| 23     | F   | Active                    | <b>34.1</b>             | <b>77.0</b>   | <b>81.0</b>   | <b>4.0</b>        | <b>619</b>        | <b>2.359</b>                   |
| 24     | –   | Active                    | <b>10.5</b>             | <b>80.0</b>   | <b>83.0</b>   | <b>3.0</b>        | <b>244</b>        | <b>4.488</b>                   |
| 25     | F   | Active                    | <b>38.6</b>             | <b>80.0</b>   | <b>85.0</b>   | <b>5.0</b>        | <b>930</b>        | <b>1.962</b>                   |
| 26     | –   | Active                    | <b>33.8</b>             | <b>85.0</b>   | <b>88.0</b>   | <b>3.0</b>        | <b>556</b>        | <b>1.969</b>                   |
| 27     | –   | Less Active               | 37.5                    | 53.0          | 53.0          | 0.0               | 66                | 0.000                          |
| 28     | M   | Less Active               | –                       | <b>56.5</b>   | <b>58.0</b>   | <b>1.5</b>        | <b>455</b>        | <b>1.203</b>                   |
| 29     | –   | Less Active               | <b>12.2</b>             | <b>69.0</b>   | <b>80.0</b>   | <b>11.0</b>       | <b>1032</b>       | <b>3.891</b>                   |
| 30     | F   | Less Active               | –                       | 44.0          | –             | –                 | 175               | –                              |
| 31     | F   | Less Active               | –                       | <b>63.0</b>   | <b>68.0</b>   | <b>5.0</b>        | <b>283</b>        | <b>6.449</b>                   |
| 32     | F   | –                         | –                       | 55.5          | –             | –                 | 1913              | –                              |
| 33     | F   | Active                    | –                       | 68.0          | 74.0          | 6.0               | –                 | –                              |
| 34     | M   | Active                    | –                       | 71.0          | 72.0          | 1.0               | –                 | –                              |
| 35     | F   | Inactive                  | –                       | 48.0          | 62.0          | 14.0              | –                 | –                              |
| Mean   |     |                           | 30.7                    | 61.7          | 69.6          | 7.6               | 573.3             | 4.9                            |
| ± s.d. |     |                           | 11.6                    | 11.7          | 11.3          | 10.3              | 506.0             | 4.1                            |

**Table S2.** Growth parameters estimated by other authors for *Raja clavata* in European waters. F: female; M: male; n: number of individuals;  $L_{\infty}$ : the asymptotic length;  $k$ : the growth coefficient;  $t_0$ : the theoretical age at length zero.

| Geographical region           | Sex   | Length range (cm) | n    | $L_{\infty}$ | $k$       | $t_0$      | Input data                | Reference     |
|-------------------------------|-------|-------------------|------|--------------|-----------|------------|---------------------------|---------------|
| North Sea                     | F     | –                 | 51   | 118.0        | 0.14      | -0.88      | Vertebrae                 | [1]           |
| North Sea                     | M     | –                 | 41   | 98.0         | 0.17      | -0.43      | Vertebrae                 | [1]           |
| Irish Sea                     | F + M | 9.0–107.0         | 2918 | 105.0        | 0.22      | 0.45       | Length-frequency analysis | [2]           |
| Irish Sea                     | F     | –                 | 1504 | 107.8–120.0  | 0.15–0.26 | -1.01–0.05 | Vertebrae                 | [3]           |
| Irish Sea                     | M     | –                 | 783  | 96.8–104.3   | 0.19–0.24 | -1.36–0.32 | Vertebrae                 | [3]           |
| Irish Sea                     | M     | 12.0–96.5         | 165  | 106.5        | 0.14      | -1.74      | Vertebrae                 | [4]           |
| Irish Sea                     | F     | 13.1–105.5        | 93   | 139.5        | 0.09      | -1.84      | Vertebrae                 | [4]           |
| Irish Sea and Bristol Channel | F     | 30.0–89.0         | 64   | 128.1        | 0.09      | -1.32      | Tag-recapture             | [5]           |
| Irish Sea and Bristol Channel | M     | 25.0–89.0         | 57   | 85.6         | 0.21      | -0.60      | Tag-recapture             | [5]           |
| Cardarthen Bay, UK            | F + M | 13.0–99.0         | 2143 | 139.2        | 0.09      | -2.63      | Vertebrae                 | [6]           |
| Caernarfon Bay, UK            | F     | –                 | 135  | 117.6        | 0.16      | -0.71      | Vertebrae                 | [7]           |
| Caernarfon Bay, UK            | M     | –                 | 54   | 100.9        | 0.18      | -0.95      | Vertebrae                 | [7]           |
| United Kingdom                | F     | –                 | 85   | 127.3        | 0.10      | -2.50      | Vertebrae                 | [8]           |
| United Kingdom                | M     | –                 | 61   | 88.3         | 0.22      | -1.30      | Vertebrae                 | [8]           |
| Portuguese Continental Coast  | F + M | 13.0–89.0         | 200  | 130.5        | 0.10      | -0.14      | Dermal denticles          | [9]           |
| Portuguese Continental Coast  | F     | 13.0–89.0         | 115  | 130.5        | 0.10      | -0.13      | Dermal denticles          | [9]           |
| Portuguese Continental Coast  | M     | 15.0–77.0         | 85   | 121.5        | 0.11      | -0.11      | Dermal denticles          | [9]           |
| Portuguese continental coast  | F + M | 19.5–91.3         | 251  | 96.7–128.0   | 0.12      | -0.62–0.58 | Dermal denticles          | [10]          |
| Portuguese continental coast  | F     | 19.9–91.3         | 129  | 101.4–140.7  | 0.1       | -0.88–0.50 | Dermal denticles          | [10]          |
| Portuguese continental coast  | M     | 19.5–87.0         | 122  | 90.6–117.1   | 0.14      | -0.36–0.72 | Dermal denticles          | [10]          |
| Mediterranean Sea             | F     | –                 | –    | 126.5        | 0.10      | -0.51      | Vertebrae                 | [11]          |
| Mediterranean Sea             | M     | –                 | –    | 116.7        | 0.11      | -0.41      | Vertebrae                 | [11]          |
| Mediterranean Sea             | F     | 29.3–64.6         | 37   | 95.7         | 0.09      | -2.60      | Vertebrae                 | [12]          |
| Mediterranean Sea             | M     | 35.9–57.8         | 53   | 61.9         | 0.22      | -1.79      | Vertebrae                 | [12]          |
| Mediterranean Sea             | F + M | 29.3–64.6         | 90   | 79.7         | 0.13      | -2.70      | Vertebrae                 | [12]          |
| Mediterranean Sea             | F + M | 8.0–88.0          | –    | 71.7–84.2    | –         | –          | Length-frequency analysis | [13]          |
| Mediterranean Sea             | F     | 14.0–110.0        | 160  | 98.7–114.6   | 0.11–2.30 | 1.02–1.23  | Vertebrae                 | [14]          |
| Mediterranean Sea             | M     | 14.6–89.0         | 125  | 92.3–100.8   | 0.14–0.40 | 0.95–1.13  | Vertebrae                 | [14]          |
| Azores                        | F + M | 37.0–102.0        | 6963 | 92.2         | 0.10      | 0.78       | Length-frequency analysis | Present study |

**Table S3.** Estimates of biological and fishery parameters for *Raja clavata* calculated from the empirical relationships between the length at first maturity ( $L_m$ ), length at maximum possible yield ( $L_{opt}$ ), life span ( $t_{max}$ ), and theoretical age at length zero ( $t_0$ ), and the asymptotic length ( $L_\infty$ ) and growth coefficient ( $k$ ). The values of  $L_\infty$  and  $k$  were derived from the  $L_T$ -frequency data collected for the period 2010–2016 as part of the EU Data Collection Framework (DCF).

| Parameter                                      | Estimates      | Empirical formula                                                            | Reference |
|------------------------------------------------|----------------|------------------------------------------------------------------------------|-----------|
| Length at first maturity ( $L_m$ )             | 48.50 cm $L_T$ | $\log(L_m) = 0.8979 \times \log(L_\infty) - 0.0782$                          | [15]      |
| Length at maximum possible yield ( $L_{opt}$ ) | 59.30 cm $L_T$ | $\log(L_{opt}) = 1.053 \times \log(L_m) - 0.0565$                            | [15]      |
| Life span ( $t_{max}$ )                        | 30.00 years    | $t_{max} = 3 / k$                                                            | [15]      |
| Theoretical age at length zero ( $t_0$ )       | 0.78 years     | $\log(-t_0) = -0.3922 - 0.2752 \times \log(L_\infty) - 1.038 \times \log(k)$ | [16]      |

## References

- Walker, P.A. Fleeting images: dynamics of North Sea ray populations, Universiteit van Amsterdam [Host], 1999.
- Brander, K.; Palmer, D. Growth rate of Raia clavata in the Northeast Irish Sea . *ICES J. Mar. Sci.* **1985**, *42*, 125–128, doi:10.1093/icesjms/42.2.125.
- Fahy, E. The south eastern ray Raja spp. fishery, with observations on the growth of rays in Irish waters and their commercial grading. 1991.
- Gallagher, M.J.; Nolan, C.P.; Jeal, F. Age, Growth and Maturity of the Commercial Ray Species from the Irish Sea. *J. Northwest Atl. Fish. Sci.* **2004**, *35*, 47–66, doi:10.2960/j.v35.m527.
- Holden, M.J. The Growth Rates of Raja Brachyura, R. Clavata and R. Montagu as Determined From Tagging Data. *ICES J. Mar. Sci.* **1972**, *34*, 161–168, doi:10.1093/icesjms/34.2.161.
- Ryland, J.S.; Ajayi, T.O. Growth and population dynamics of three Raja species (Batoidei) in Carmarthen Bay, British Isles. *ICES J. Mar. Sci.* **1984**, *41*, 111–120, doi:10.1093/icesjms/41.2.111.
- Whittamore, J.M.; McCarthy, I.D. The population biology of the thornback ray, Raja clavata in Caernarfon Bay, north Wales. *Mar. Biol. Assoc. United Kingdom. J. Mar. Biol. Assoc. United Kingdom* **2005**, *85*, 1089.
- Taylor, A.J.; Holden, M.J. The preparation and use of vertebrae for age determination in rays. *ICES C.* **1964**, *145*, 1–3.
- Serra-Pereira, B.; Figueiredo, I.; Bordalo-Machado, P.; Farias, I.; Moura, T.; Gordo, L.S. Age and growth of Raja clavata Linnaeus, 1758—evaluation of ageing precision using different types of caudal denticles. *ICES Doc. C.* **2005**, 1–10.
- Serra-Pereira, B.; Figueiredo, I.; Farias, I.; Moura, T.; Gordo, L.S. Description of dermal denticles from the caudal region of Raja clavata and their use for the estimation of age and growth. *ICES J. Mar. Sci.* **2008**, *65*, 1701–1709.
- Ragonese, S.; Andreoli, M.G.; Bono, G.; Giusto, G.B.; Rizzo, P.; Sinacori, G. Overview of the available biological information on demersal resources of the Strait of Sicily. *MedSudMed Tech. Doc.* **2004**, *2*, 67–74.
- Yeldan, H.; Avşar, D.; Manaşırılı, M. Some biological peculiarities of thornback ray, Raja clavata (Linnaeus, 1758) in the northeast Mediterranean. *Su Ürünleri Derg.* **2008**, *25*.

13. Bottari, T.; Rinelli, P.; Bianchini, M.L.; Ragonese, S. Stock identification of *Raja clavata* L. (Chondrichthyes, Rajidae) in two contiguous areas of the Mediterranean. *Hydrobiologia* **2013**, *703*, 215–224, doi:10.1007/s10750-012-1361-0.
14. Kadri, H.; Marouani, S.; Saïdi, B.; Bradai, M.N.; Bouaïn, A.; Morize, E. Age, growth, sexual maturity and reproduction of the thornback ray, *Raja clavata* (L.), of the Gulf of Gabès (south-central Mediterranean Sea). *Mar. Biol. Res.* **2014**, *10*, 416–425, doi:10.1080/17451000.2013.797584.
15. Froese, R.; Binohlan, C. Empirical relationships to estimate asymptotic length, length at first maturity and length at maximum yield per recruit in fishes, with a simple method to evaluate length frequency data. *J. Fish Biol.* **2000**, *56*, 758–773, doi:https://doi.org/10.1111/j.1095-8649.2000.tb00870.x.
16. Pauly, D. *Theory and Management of Tropical Multi-Species Stocks: A Review, with Emphasis on the Southeast Asian Demersal Fisheries*; International Center for Living Aquatic Resources Management: Manila, Philippines, 1979; Vol. 1;.
